# Supplementary material
Source: PubMed Central journal article supplement (PMC2781458)

### Supplemental data figure 1:

BIM-46187 was ineffective to inhibit the EGF-induced tyrosine phosphorylation of FAK at Y925 in human colon cancer cells.

Where indicated, cells were pre-incubated for 10, 20 min, and overnight with BIM-46187 at the indicated concentrations. Lysates prepared from HCT8/S11 cells treated for 30 min with EGF were analyzed by direct immunoblotting.

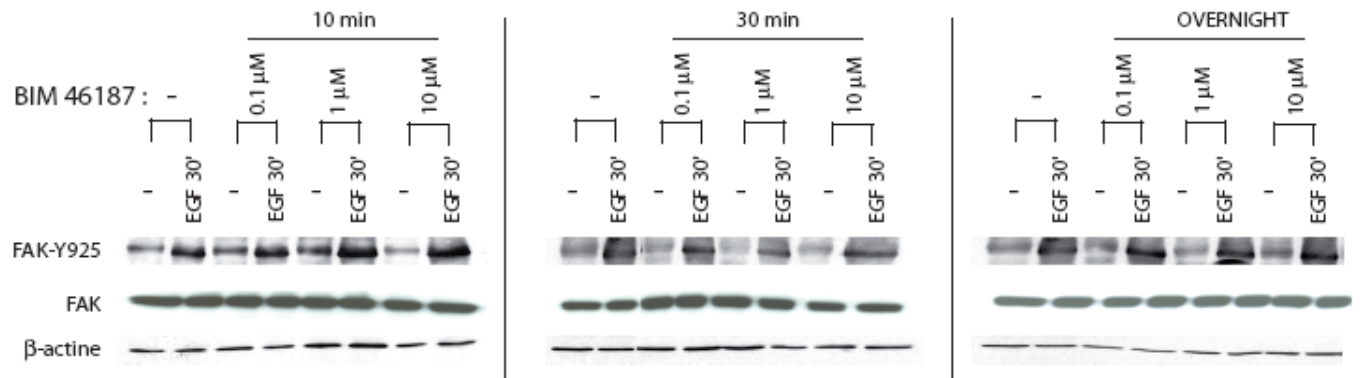

### Supplemental data figure 2: Lack of BIM-46187 effect on the physical interaction between GB1 and GB2.

Gamma aminobutyric acid type B (GABA(B)) receptors have recently been shown to dimerize and are obligate heterodimers of homologous GB1 and GB2 subtypes. COS-7 cells co-expressing GB1-Rluc and GB2-YFP subunits were pre-treated or not 2 hours with increasing concentrations of BIM-46187 and BRET signal was measured.

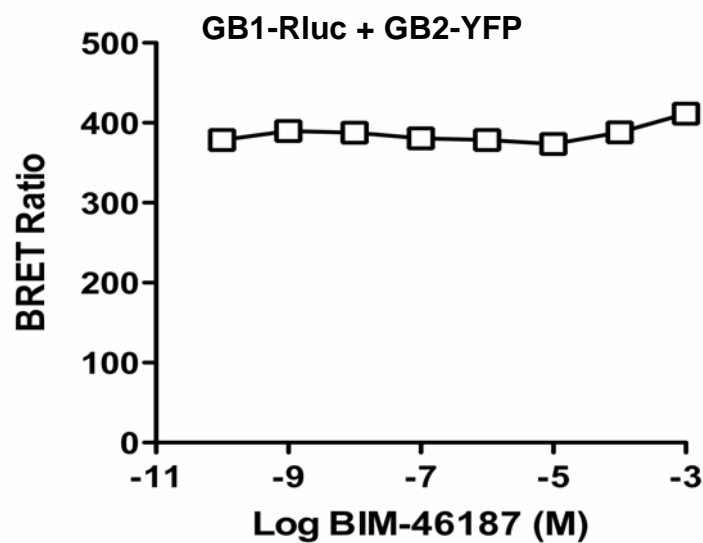

Supplement: supp_M109.042333_jbc.M109.042333-1.pdf [file supp_M109.042333_jbc.M109.042333-1.pdf]
